# Supplementary material
Source: publisher site journal article supplement (https://www.dovepress.com/article/498940)
Supplement: Supplementary file 1 [file get_supplementary_file.php]

**Supplementary Table 1**. Extended Subgroup Analyses with Corrected Baseline IOP and P-values Demonstrating Changes in IOP over Time

### POAG Subgroup Analysis

| Time point | KDB group (n = 15) | |  | TMH group (n = 12) | |  | p-value ** |
| --- | --- | --- | --- | --- | --- | --- | --- |
|  | IOP at each time point (mmHg), mean ± SD | % change from the baseline, mean ± SD | p-value* | IOP at each time point (mmHg), mean ± SD | % change from the baseline, mean ± SD | p-value* |  |
| Baseline | 19.07 ± 3.49 | |  | 16.58 ± 3.26 | |  |  |
| 1 month | 15.53 ± 3.87 | 17.31 ± 20.34 | 0.00375 | 16.00 ± 4.05 | 1.82 ± 27.80 | 0.613 | 0.1275 |
| 3 months | 15.00 ± 3.05 | 19.74 ± 19.17 | 0.000968 | 13.91 ± 3.48 | 11.45 ± 24.55 | 0.0415 | 0.32415 |
| 6 months | 14.40 ± 2.75 | 22.86 ± 17.06 | 7.51e-05 | 14.80 ± 3.49 | 5.91 ± 27.68 | 0.237 | 0.083168 |

*Calculated using a linear mixed model of IOP between the preoperative and postoperative values

**Calculated using a linear mixed model of the % change from the baseline between the hooks

IOP, intraocular pressure; KDB, Kahook dual blade; TMH, Tanito ab interno trabeculotomy microhook; SD, standard deviation

### PXG Subgroup Analysis

| Time point | KDB group (n = 3) | |  | TMH group (n = 6) | |  | p-value ** |
| --- | --- | --- | --- | --- | --- | --- | --- |
|  | IOP at each time point (mmHg), mean ± SD | % change from the baseline, mean ± SD | p-value* | IOP at each time point (mmHg), mean ± SD | % change from the baseline, mean ± SD | p-value* |  |
| Baseline | 23.33 ± 2.31 | |  | 22.17 ± 6.82 | |  |  |
| 1 month | 14.33 ± 1.15 | 37.88 ± 10.50 | 0.0038 | 14.00 ± 3.29 | 30.05 ± 34.32 | 0.0248 | 0.747 |
| 3 months | 16.00 ± 2.65 | 30.30 ± 17.21 | 0.0224 | 12.50 ± 2.59 | 36.63 ± 29.24 | 0.0088 | 0.941 |
| 6 months | 13.00 ± 1.73 | 43.47 ± 12.31 | 0.00344 | 11.83 ± 2.23 | 40.64 ± 25.93 | 0.00667 | 0.7680 |

*Calculated using a linear mixed model of IOP between the preoperative and postoperative values

**Calculated using a linear mixed model of the % change from the baseline between the hooks

IOP, intraocular pressure; KDB, Kahook dual blade; TMH, Tanito ab interno trabeculotomy microhook; SD, standard deviation

**Supplementary Table 2**. Extended Subgroup Analyses with Corrected Baseline IOP and P-values Demonstrating Changes in the Medication Score over Time

### POAG Subgroup Analysis

| Time point | KDB group (n=15) | |  | TMH group (n=12) | |  |  |
| --- | --- | --- | --- | --- | --- | --- | --- |
|  | Medication score at each time point,  mean ± SD | Change in the medication score, mean ± SD | p-value* | Medication score at each time point, mean ± SD | Change in the medication score,  mean ± SD | p-value* | p-value** |
| Baseline | 4.4 ± 1.0 | |  | 4.3 ± 1.5 | |  |  |
| 1 month | 1.8 ± 1.4 | −2.6 ± 1.4 | 1.1E-06 | 3.1 ± 2.0 | −1.2 ± 1.5 | 0.0060 | 0.0225 |
| 3 months | 2.7 ± 1.5 | −1.7 ± 1.1 | 2.7E-05 | 3.0 ± 1.0 | −1.3 ± 1.1 | 4.8E-04 | 0.384 |
| 6 months | 2.9 ± 1.5 | −1.5 ± 1.0 | 3.3E-05 | 3.2 ± 1.0 | −1.0 ± 1.3 | 0.0083 | 0.246 |

*Calculated using a linear mixed model of medication scores between pre- and postoperative values

**Calculated using a linear mixed model of the change from baseline between the hooks

KDB, Kahook Dual Blade; TMH, Tanito ab interno trabeculotomy microhook; SD, standard deviation

### PXG Subgroup Analysis

| Time point | KDB group (n=3) | |  | TMH group (n=6) | |  |  |
| --- | --- | --- | --- | --- | --- | --- | --- |
|  | Medication score at each time point,  mean ± SD | Change in the medication score, mean ± SD | p-value* | Medication score at each time point, mean ± SD | Change in the medication score,  mean ± SD | p-value* | p-value** |
| Baseline | 3.7 ± 1.2 | |  | 5.7 ± 2.0 | |  |  |
| 1 month | 1.3 ± 0.6 | −2.3 ± 0.6 | 0.0033 | 2.0 ± 3.1 | −3.7 ± 3.8 | 0.0267 | 0.982 |
| 3 months | 0.7 ± 1.2 | −3.0 ± 0.0 | 2.0E-16 | 1.5 ± 2.0 | −4.2 ± 3.0 | 0.0059 | 0.991 |
| 6 months | 0.7 ± 1.2 | −3.0 ± 0.0 | 2.0E-16 | 1.5 ± 2.0 | −4.2 ± 3.0 | 0.0059 | 0.991 |

*Calculated using a linear mixed model of medication scores between pre- and postoperative values

**Calculated using a linear mixed model of the change from baseline between the hooks

KDB, Kahook Dual Blade; TMH, Tanito ab interno trabeculotomy microhook; SD, standard deviation
